# Supplementary material for: Coordinate regulation of ELF5 and EHF at the chr11p13 CF modifier region
Source: PubMed Central journal article supplement (PMC6815777; doi:10.1111/jcmm.14646), 2019-09-26
Supplement: JCMM-23-7726-s001.pdf [file JCMM-23-7726-s001.pdf]

Supplemental Table S1: gRNA sequences used to generate CRISPR/Cas9 deletion clones.

|                    | 5'                    | 3'                    |
|--------------------|-----------------------|-----------------------|
| EHF intron 6 gRNAs | GTCAATAGTCCTTCTTAAGAT | GTTTAGGTCGTGGAATCAGAG |
| 11.2521 gRNAs      | GTTTCCATGCCTCTTACCAT  | GTAAGGATATGCTGGTAGGA  |
| 11.2516 gRNAs      | GAGTGTTTCTGATGATCAGTG | GACAGAGCTGGCATAGTAAAT |

Supplemental Table S2: PCR primers used for validation of CRISPR/Cas9 homozygous deletion clones.

|                                      | Forward              | Reverse              |
|--------------------------------------|----------------------|----------------------|
| EHF intron 6 PCR (external)          | AGCTGGGCCATCCTCTTTTC | TTTTTGGTGTGGCACTTGGC |
| EHF intron 6 PCR (internal/external) | CTCCATCCTGCCATGACGTT | TTTTTGGTGTGGCACTTGGC |
| 11.2521 PCR (external)               | GCGCATGTGTTCAAAGTGCT | TGGGTAGGGAAGTGGGTAGG |
| 11.2521 PCR (internal/external)      | GCGCATGTGTTCAAAGTGCT | TTACCCAACCCACAGGAGA  |
| 11.2516 PCR (external)               | GTACAGGGGCCACACATAGC | GCAGGGTGCTGCTTACAGA  |
| 11.2516 PCR (internal/external)      | GAGGTGGTTGCTCCAACGTA | GCAGGGTGCTGCTTACAGA  |

Supplemental Table S3: Primers used for RT-qPCR.

|                                     | Forward               | Reverse                  |
|-------------------------------------|-----------------------|--------------------------|
| Beta-2 -Microglobulin ( $\beta$ 2M) | ACTGAATTCACCCCACTGA   | CCTCCATGATGCTGCTTACA     |
| ELF5                                | TGCTTGAAAACAAGTGGCATC | AGGGCTTCCGATTTAACCACC    |
| EHF                                 | GCAGCATGAGTTTGCAGGAG  | GTGTGTGGACTGGAAACAGGT    |
| APIP                                | GGCCACACTTCTTTCCAG    | GCATGAGCCATTCTATCTTTGAGG |

Supplemental Table S4: Primers used for ChIP-qPCR.

|                        | Forward                  | Reverse                    |
|------------------------|--------------------------|----------------------------|
| 11p13 Negative Control | TCCTTCCAGGTTTTGGCTCC     | GCCCCAGATCAGGAGAGAGA       |
| CFTR +48.9             | GGCATCAGCCAGTCAAGGTT     | AGCAGAGGGCAAAGTGGTACTT     |
| ELF5 Intron 4          | CCCCATGACACTAGCAGTCC     | TACAGTCTGGGTTCACTGC        |
| ELF5 Intron 3          | ACTCGCTCCCTTTTCCCTAA     | AAGTCCTTTCCATCGTGTG        |
| ELF5 Intron 2          | CTGAATGTCTAAGACTTGGTTGGA | TTAAAGAATGAGGTTAACAGAAGTGA |
| ELF5 Promoter/Intron 1 | AGAGGGCAAATGGGTTTCTT     | CACCCCTCGATACAGAGAA        |
| 11.2512                | GCTTCTATTCATTCACCCAACAC  | GTAGTAGCCCTGCCACCAGA       |
| HB11.1485              | GATTTTCCGAAGCTGTGGAGG    | CCACCATACGCAATCACAGG       |
| 11.2516                | AATCTTCTCCTGCCCACT       | TCCGGTAGGGGTAATGACA        |
| EHF Intron 6           | CCCGTAAAGAAATGGCTCAC     | AGGCCAAGGTCCTATCCAGT       |
| APIP +84 kb            | TCATGAGAAGCCACATGGAG     | GACATTTCTGGTGCCTTGGT       |
| APIP Intron 2          | CTGTCATGCAAAGAATCAGGTTT  | TAAGAACTGTCCAGCAGAGGTC     |

|                  |                      |                       |
|------------------|----------------------|-----------------------|
| ELF5 ChIP Peak 1 | CACAGAAACCCACACACTG  | TAGTTTGGGGCATTTCAGG   |
| ELF5 ChIP Peak 2 | CCCAGCAGTCTTTTCTCTGC | CCTGCGTTTTTCAGTTTGGAT |
| ELF5 ChIP Peak 3 | AAGCAGGGGAAGTGAATCT  | CTTCCAGGCTTAGGGAGGAC  |
| ELF5 ChIP Peak 4 | CTGAAATAATGGCCCTGCAT | TGTAGGTTGCAGGGTGAGGT  |
| ELF5 ChIP Peak 5 | GGTGCCATCTCTGAAAGC   | ACGTGTCTCAGGTCAAACC   |

Supplemental Table S5: Primers used for 4C library generation. Red indicates P5 sequence; blue indicates P7 sequence.

|               | Reading Primer                                                                       | Non-Reading Primer                                |
|---------------|--------------------------------------------------------------------------------------|---------------------------------------------------|
| ELF5 Promoter | AATGATACGGCGACCACCGAACACTCTTT<br>CCCTACACGACGCTCTTCCGATCTGCCTC<br>CTTTCAAGCTTTAAATTC | CAAGCAGAAGACGGCAT<br>ACGA AATCCTCTCACGAA<br>CTGCC |
| HB11.1485     | AATGATACGGCGACCACCGAACACTCTTT<br>CCCTACACGACGCTCTTCCGATCTCTTGG<br>GGAGTAGCAAAAGAT    | CAAGCAGAAGACGGCAT<br>ACGATCCAAACCTCTATT<br>TCCTCA |
| 11.2516       | AATGATACGGCGACCACCGAACACTCTTT<br>CCCTACACGACGCTCTTCCGATCTCTCCC<br>CAAATTAGCACCATG    | CAAGCAGAAGACGGCAT<br>ACGAAGGCAGCCTTCTT<br>GCTTTCT |
| EHF Promoter  | AATGATACGGCGACCACCGAACACTCTTT<br>CCCTACACGACGCTCTTCCGATCTTTAGT<br>CCACCCTGCTTTGG     | CAAGCAGAAGACGGCAT<br>ACGATTAGGGCTCAGAG<br>TACACGG |

Supplemental Table S6: sgRNAs used for VPR-mediated activation. Red indicates BbsI (Bpil) cut site.

|               | Forward                   | Reverse                   |
|---------------|---------------------------|---------------------------|
| ELF5 Promoter | CACCGCACAGCCCCCTTTGATGA   | AAACTCATCAAAGGGGCTGTGC    |
| EHF Promoter  | CACCGTAGGGAATTCCCGTTGG    | AAACCCAACCGGAATCCCTAC     |
| 11.2512       | CACCGTCCTTTCTGGAGACAATAGG | AAACCCTATTGTCTCCAGAAAGGAC |
| 11.2516       | CACCGTTCAAAGACAGATGATGGGG | AAACCCCATCATCTGTCTTTGAAC  |
| EHF Intron 6  | CACCGTCTACACTAGATAAACCATG | AAACCATGTTTATCTAGTGTAGAC  |
| 11.2521       | CACCGATGCGAGGTATTCTTCCCGG | AAACCCGGGAAGAATACCTCGCATC |
| 11.2522       | CACCGATGTCTCAGAGTCTCAACCA | AAACTGGTTGAGACTCTGAGACATC |
| 11.2523       | CACCGCCACCATTAGCTGTGCAGTG | AAACCACTGCACAGCTAATGGTGCC |
| 11.2524       | CACCGTCATGCATTGCTTAACAACA | AAACTGTTGTTAAGCAATGCATGAC |
| 11.2525       | CACCGCTTACCTCCACAGCACACAC | AAACGTGTGTGCTGTGGAGGTAAGC |
| 11.2526       | CACCGACTGTTTATTGCAGATAAGG | AAACCTTATCTGCAATAAACAGTC  |
| 11.2527       | CACCGTCAGCCCCTGACTCCCCTG  | AAACCAGTGGGAGTCAGGGGCTGAC |
| 11.2528       | CACCGAAGGTGTTTACAATCTGAG  | AAACCTCAGATTGTGAAACACCTTC |
| 11.2529       | CACCGAAGATTTGGCTTGGCTTCAG | AAACCTGAAGCCAAGCCAAATCTTC |
| 11.2530       | CACCGAAAGTGAGGTCATGATTGAG | AAACCTGAATCATGACCTCACTTTC |
